# Supplementary material for: Principles of nucleation of H3K27 methylation during embryonic development
Source: HighWire-hosted journal article supplement (doi:10.1101/gr.159608.113), 2013-12-11
Supplement: SuppMaterial.pdf [file SuppMaterial.pdf]

## **Supplemental Material**

### **Principles of nucleation of H3K27 methylation during embryonic development**

#### **Authors**

Simon J. van Heeringen, Robert C. Akkers, Ila van Kruijsbergen, M. Asif Arif, Lars L.P. Hanssen, Nilofar Sharifi, Gert Jan C. Veenstra

## Supplemental Methods

### Motif analysis of PRC2 peaks

GimmeMotifs (van Heeringen and Veenstra, 2011) was run on the overlap of EZH2 and Jarid2 peaks. Default parameters were used, background was set to 'random' and analysis to 'large'. All the resulting motifs were combined with the vertebrate motifs from JASPAR 2010 (Portales-Casamar et al., 2009) and the motifs determined by protein binding microarray from UniPROBE (Newburger and Bulyk, 2009). Maximum enrichment of all motifs was determined and all motifs with an enrichment of at least 3 fold compared to random genomic sequences and occurring in at least 1% of the peaks were clustered (Heeringen et al., 2011). The resulting motifs are shown with their enrichment in Supplemental Figure 6.

### Repeat analysis

We downloaded the repeat track from the UCSC Genome Browser for *Xenopus tropicalis* JGI 4.1 (UCSC xenTro2), as the repeat annotation for JGI 7.1 is not available. All sequences for the three different types of H3K27me3 domains, were mapped to xenTro2 using blat. Overlap with the repeats was also calculated for random genomic regions. All repeats occurring with a frequency of at least 1 repeat per 100kb and an over-representation of at least 2 times compared to random genomic background are summarized in Supplemental Table 3.

### Nucleosome positioning

We calculated the nucleosome occupancy using an empirical statistical model (van der Heijden et al., 2012). This algorithm uses the periodic occurrence of the dinucleotides TA, TT, AA and GC and can identify nucleosome positioning sequences with several base pair accuracy. We scanned a 20kb window around the center of all H3K27me3 domains using a sliding window of 1kb with a step size of 100bp. For each window of 1kb the nucleosome positioning signal was calculated using default parameters and the signal was averaged over 2 consecutive windows per H3K27me3 domain. In figure 3A the mean of all H3K27me3 domains is plotted.

### Conserved motifs from the SVMs of three species

We used the k-mer SVM results of all three species (frog, zebrafish, human) to identify conserved motifs that are enriched or depleted in H3K27me3 domains. The k-mer SVM algorithm produces an output file containing the weight of each k-mer. We converted the k-mer weights of all the 8-mers in each species to a ranked list, and combined the ranks of the three species to produce a mean rank per k-mer. Thus, k-mers that are generally positive in different organisms will have a higher rank than k-mers which are specific for one organism. We took the 5% highest and lowest ranked k-mers and selected those that had a different distribution around the H3K27me3 domain border ( $\pm 3$ kb) in *Xenopus*. K-mers that exhibited a significantly different distribution (Wilcoxon rank sum test,  $p < 0.01$ ) were clustered using the motif clustering algorithm of GimmeMotifs (van Heeringen and Veenstra, 2011; Heeringen et al., 2011). After clustering we calculated enrichment and significance of the clustered motifs. All significantly enriched (or depleted;  $p < 0.05$ ) motifs are shown in Supplemental Figs. 11 and 12.

Supplemental Figures 1-13:

A

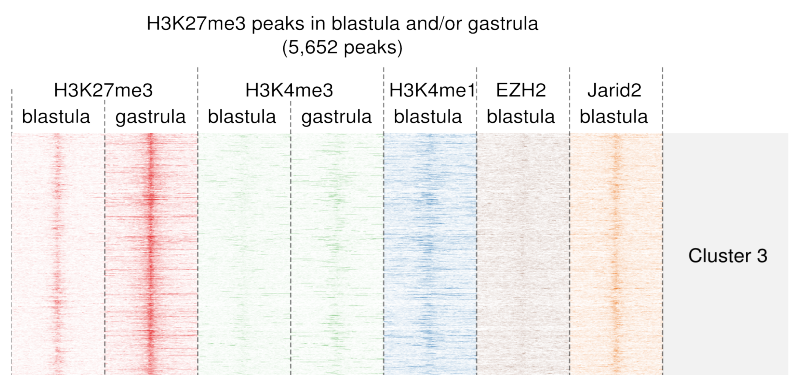

B

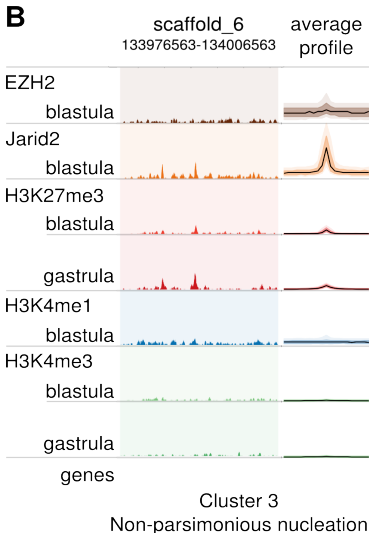

**Supplemental Fig. 1.** Cluster 3 of H3K27me3 sites. These sites show Jarid2 but no Ezh2 occupancy and are enriched for many different types of repeats (Supplemental Table 3-III). They don't gain H3K27me3 during subsequent development (Supplemental Figure 2), generally do not co-localize with genes and their functional relevance is unclear.

**(A)** Heatmap of a K-means clustering analysis ( $k=3$ , Euclidian distance) of H3K27me3 (blastula and gastrula), H3K4me3 (blastula and gastrula), H3K4me1, Ezh2 and Jarid2 (blastula) in 10 kb regions around H3K27me3 peak summits. The intensity of the color represents the number of reads per 100 bp window. Cluster 3 is visualized, the first two clusters are shown in Figure 1A.

**(B)** Average profile and representative example of the cluster shown in A. The average profiles show the mean enrichment (black line) and the 50<sup>th</sup> and 90<sup>th</sup> percentiles in a dark and lighter color respectively.



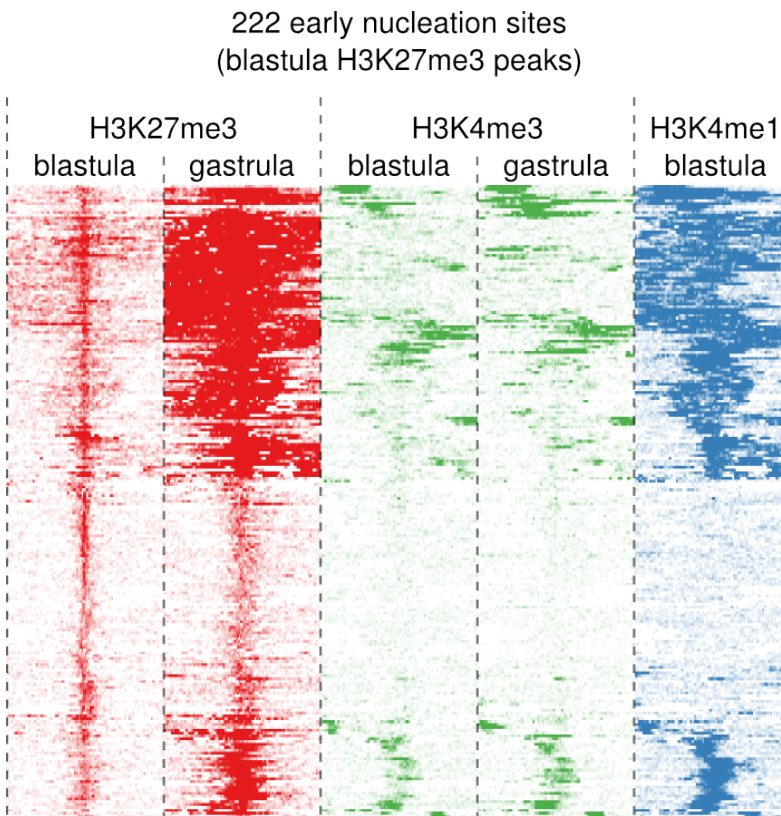

**Supplemental Fig. 3.** Heatmap of an hierarchical clustering of H3K27me3 in blastula and gastrula (red), H3K4me3 in blastula and gastrula (green) and H3K4me1 in blastula (blue) around H3K27me3 early nucleation sites ( $\pm 5$ kb). Early nucleation sites were defined as blastula H3K27me3 peaks that were present as a broad domain in the gastrula H3K27me3 data. The intensity of the color represents the number of reads per 100 bp window. In most of the early nucleation sites there is no evidence of H3K27me3, indicating that these sites do not generally occur in promoters.

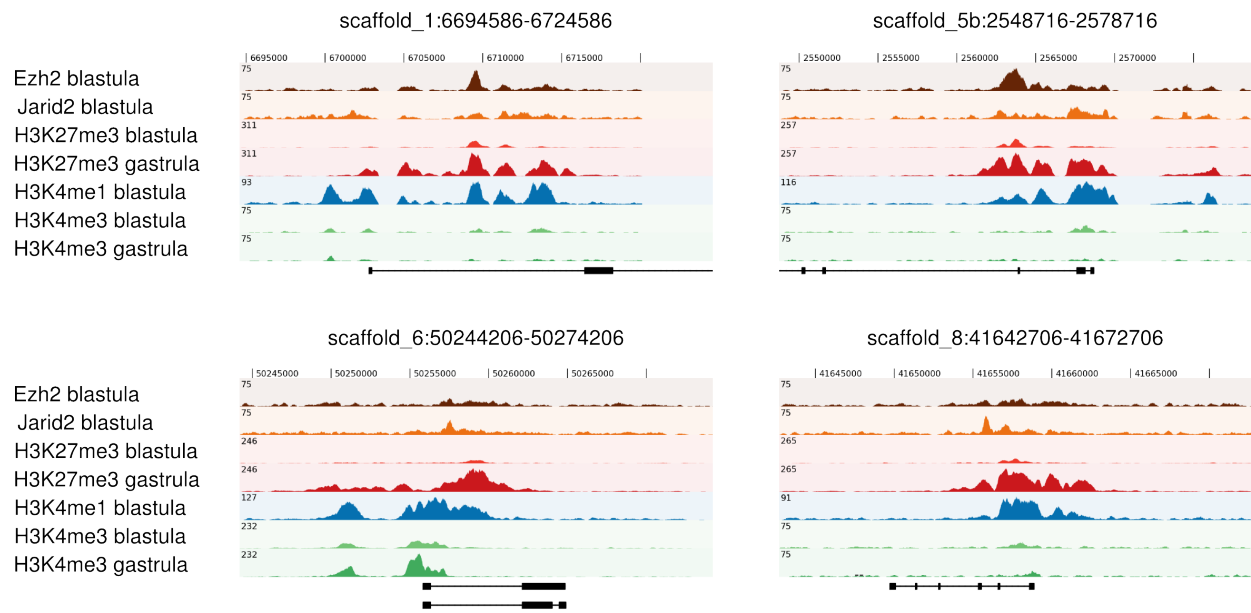

**Supplemental Fig. 4.** Examples of early nucleation that are not located in promoters. Shown is a 30kb region around the early nucleation sites. The tracks show, from top to bottom: Ezh2 (brown), Jarid2 (orange), H3K27me3 blastula (red), H3K27me3 gastrula (red), H3K4me1 (blue), H3K4me3 blastula (green), H3K4me3 gastrula (green) and gene structure. The Y-axis shows the number of overlapping reads.

7,156 PRC2 binding locations  
(EZH2 and/or Jarid2 peak)

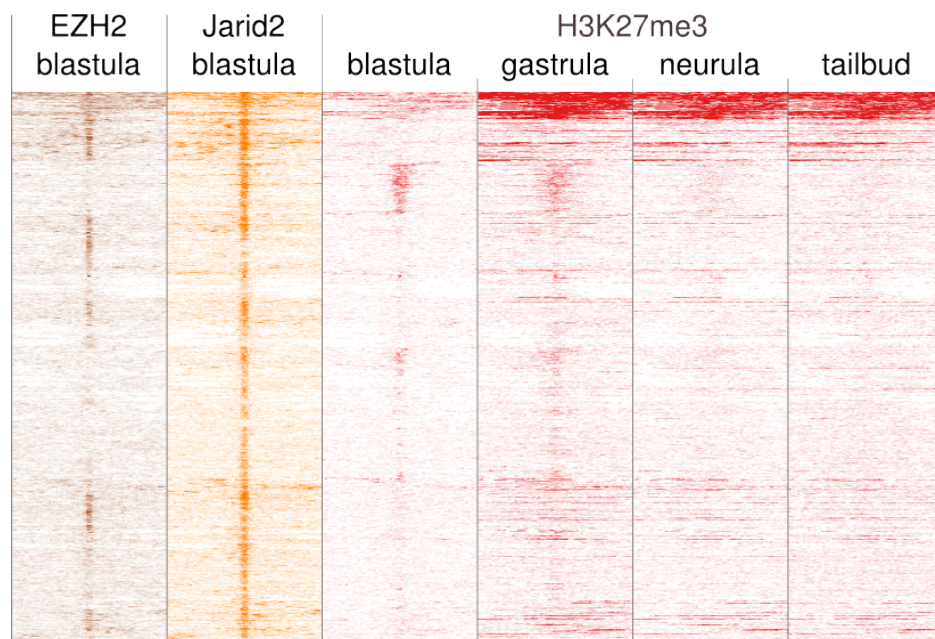

**Supplemental Fig. 5.** The majority of PRC2 binding sites does not gain H3K27me3. Clustering of EZH2, Jarid2, H3K27me3 (stage 9 blastula, stage 12 gastrula, stage 16 neurula, stage 30 tailbud) around peaks of EZH2 and/or Jarid2. Hierarchical clustering using Euclidian distance of 10 kb regions in 100bp bins.

| Motif                                                                               | Enr. | Type                    |
|-------------------------------------------------------------------------------------|------|-------------------------|
|    | 41.0 | Pou2f2, Pou2f3          |
|    | 36.0 | Pou5f1, Sox2            |
|    | 19.3 | GimmeMotifs_10          |
|    | 15.3 | GimmeMotifs_12          |
|    | 12.7 | Forkhead / Winged helix |
|    | 9.5  | GimmeMotifs_4           |
|    | 8.8  | Homeobox                |
|    | 5.6  | SRY / HMG-box           |
|   | 4.3  | T-box                   |
|  | 4.2  | Iroquois homeobox       |
|  | 4.0  | Obox1                   |
|  | 3.0  | Sox13                   |

**Supplemental Fig. 6.** Motifs enriched in PRC2 binding sites. Combined motifs of GimmeMotifs (van Heeringen and Veenstra, 2011), JASPAR (Portales-Casamar et al., 2009) and Uniprobe (Newburger and Bulyk, 2009) are shown with the enrichment relative to random genomic sequences. Only motifs with an enrichment higher than 3 and a minimum occurrence in 1% of the PRC2 peaks are shown.



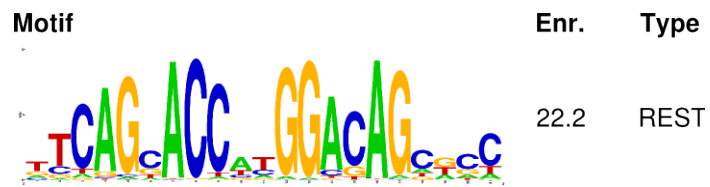

**Supplemental Fig. 7.** The REST motif is enriched in *Xenopus* gastrula (stage 12) H3K27me3 domains.

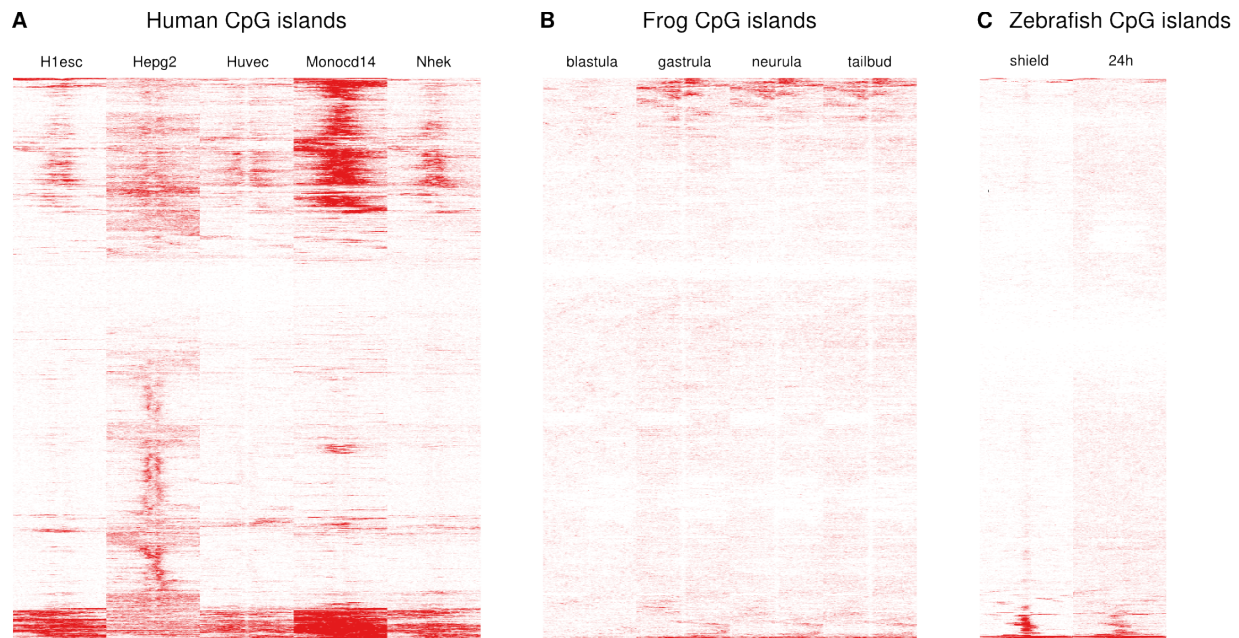

**Supplemental Fig. 8.** H3K27me3 enrichment around CpG islands in **(A)** 5 different human cell lines from ENCODE (H1-hESC, HepG2, HUVEC, MONOCD14, NHEK), **(B)** four developmental stages (blastula stage 9, gastrula stage 12, neurula stage 16 and tailbud stage 30) in *Xenopus tropicalis* and **(C)** two developmental stages (shield and 24h) in zebrafish. For human, CpG islands were downloaded from the UCSC Genome Browser. *Xenopus* and zebrafish CpG islands were predicted using the method of Takai and Jones (Takai and Jones, 2002). Shown is the H3K27me3 enrichment in 100 bp bins, 5kb around 5000 randomly selected CpG islands.

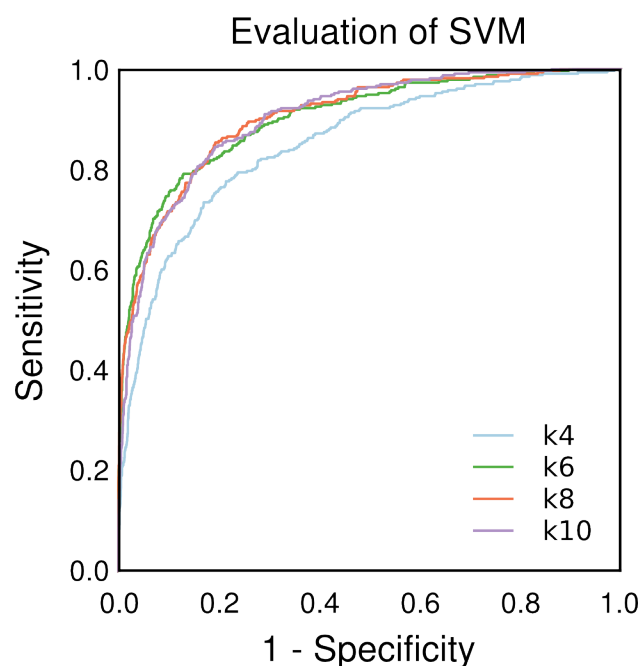

**Supplemental Fig. 9.** Performance of the k-mer SVM in classifying H3K27me3-positive regions. Different k-mer sizes for SVM training are shown, k-mer 8 is used in all subsequent analysis. Prediction performance as shown as a Receiver Operating Curve (ROC) that plots the fraction of true positives versus the fraction of false positives; a high area under the curve (AUC ~1) corresponds to high accuracy and sensitivity.

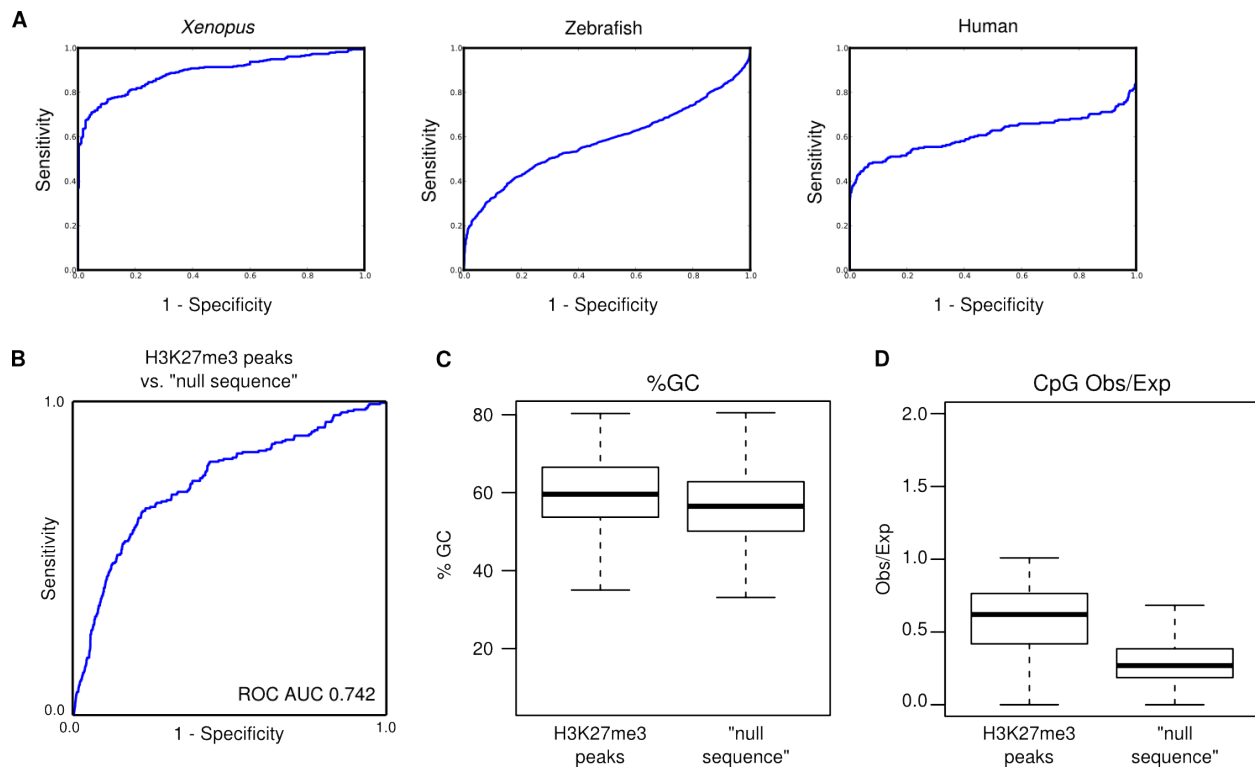

**Supplemental Fig. 10. Performance of the k-mer SVM relative to background sequences.**

(A) Performance of the k-mer SVM (k=8) in each species relative to a randomly generated background with the same dinucleotide frequencies. H3K27me3 domains were used as a positive set; a negative set was generated using a 1<sup>st</sup> order Markov Model resulting in a random sequence set with similar dinucleotide distributions. Prediction performance as shown as a Receiver Operating Curve (ROC) that plots the fraction of true positives versus the fraction of false positives. The SVM can distinguish H3K27me3 domains from random sequence, indicating that dinucleotide composition is not the sole feature that sets apart H3K27me3 regions, even in human where the dinucleotide composition in H3K27me3-enriched regions is very different from that of most of the genome. An equal number of sequences was used for the positive and negative sets (*Xenopus* 338, zebrafish 1,696, human 229). (B) Performance of the human 8-mer SVM relative to background sequences selected from the genome. Background sequences were selected using the random sampling method implemented as the “Generate Null Sequence” option at <http://kmersvm.beerlab.org/>. The set of H3K27me3 sequences (229 sequences not used in SVM training) was used as input BED file to generate a set of sequences similar in GC content and repeat fraction. Out of 4,580 regions, 1,669 (36%) were positive for H3K27me3 in at least one of the cell lines shown in Supplemental Fig. 8 and were removed. Prediction performance is shown as a Receiver Operating Curve (ROC) that plots the fraction of true positives versus the fraction of false positives. However, by removing the H3K27me3-positive sequences this set is no longer completely matched in %GC or CpG content, see C) and D). (C) %GC of the two sequence sets used in B) (H3K27me3 peaks and generated null sequences). (D) Observed number of CpGs divided by expected number of CpGs (Obs/Exp; Gardiner-Garden and Frommer, 1987) of the two sequence sets used in B).

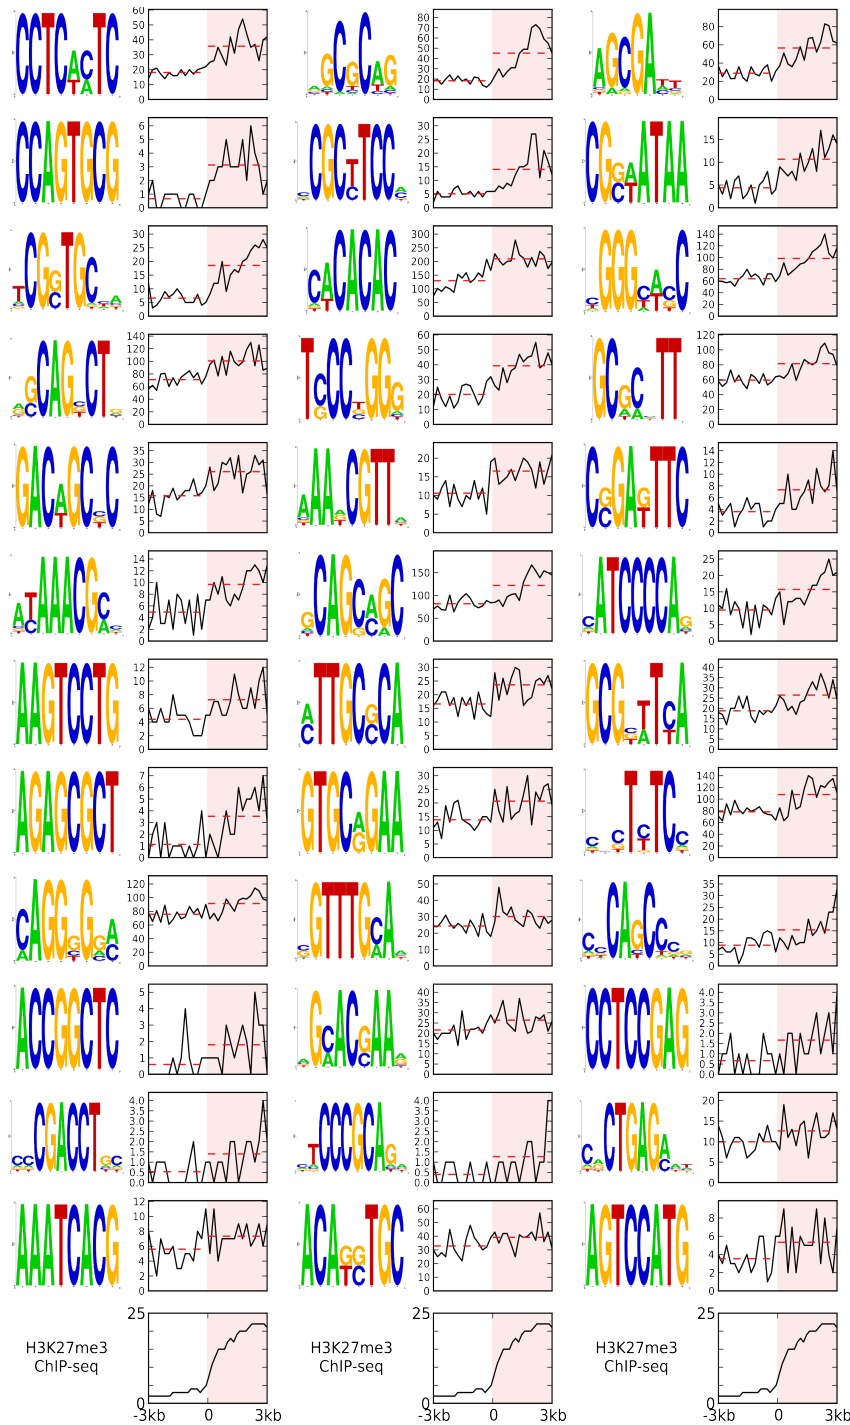

**Supplemental Fig. 11.** Consistently enriched motifs in H3K27me3 domains. Motifs were obtained from the SVM output of three species (see “Conserved motifs from the SVMs of three species”). Shown is the occurrence of the motifs from -3kb to +3kb around the H3K27me3 peak border in 200 bp bins. For comparison, the H3K27me3 ChIP-seq signal is shown in the bottom graph.

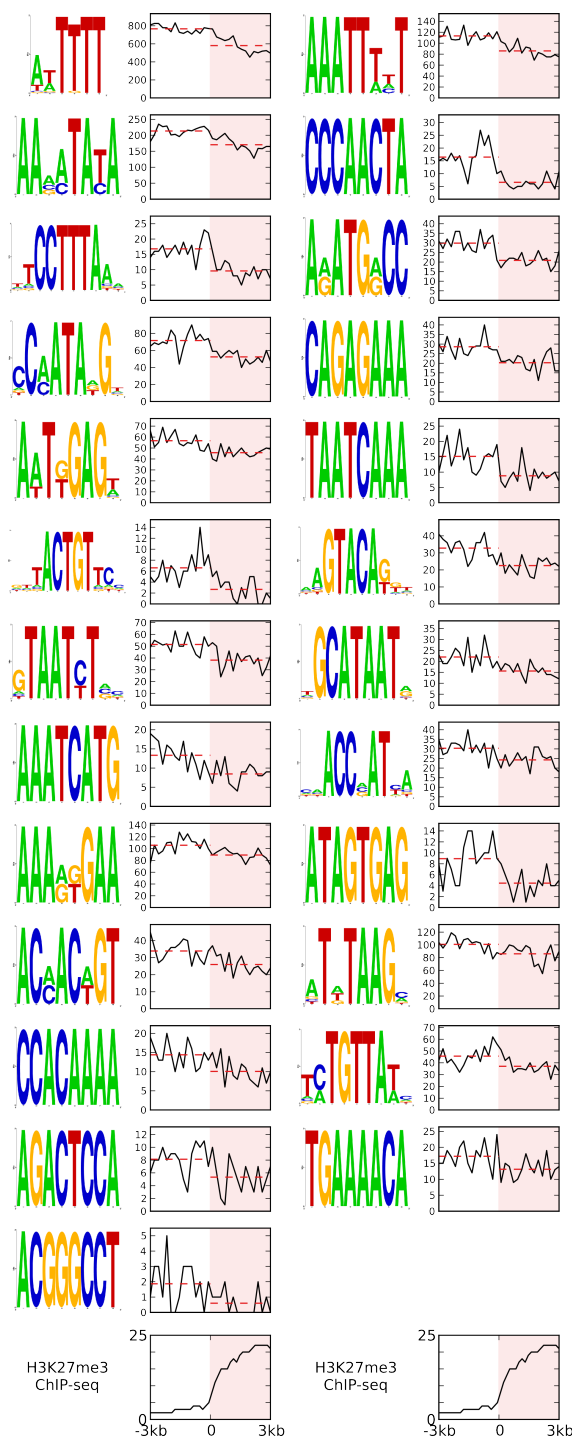

**Supplemental Fig. 12.** Consistently depleted motifs in H3K27me3 domains. Motifs were obtained from the SVM output of three species (see “Conserved motifs from the SVMs of three species”). Shown is the occurrence of the motifs from -3kb to +3kb around the H3K27me3 peak border in 200 bp bins. For comparison, the H3K27me3 ChIP-seq signal is shown in the bottom graph.



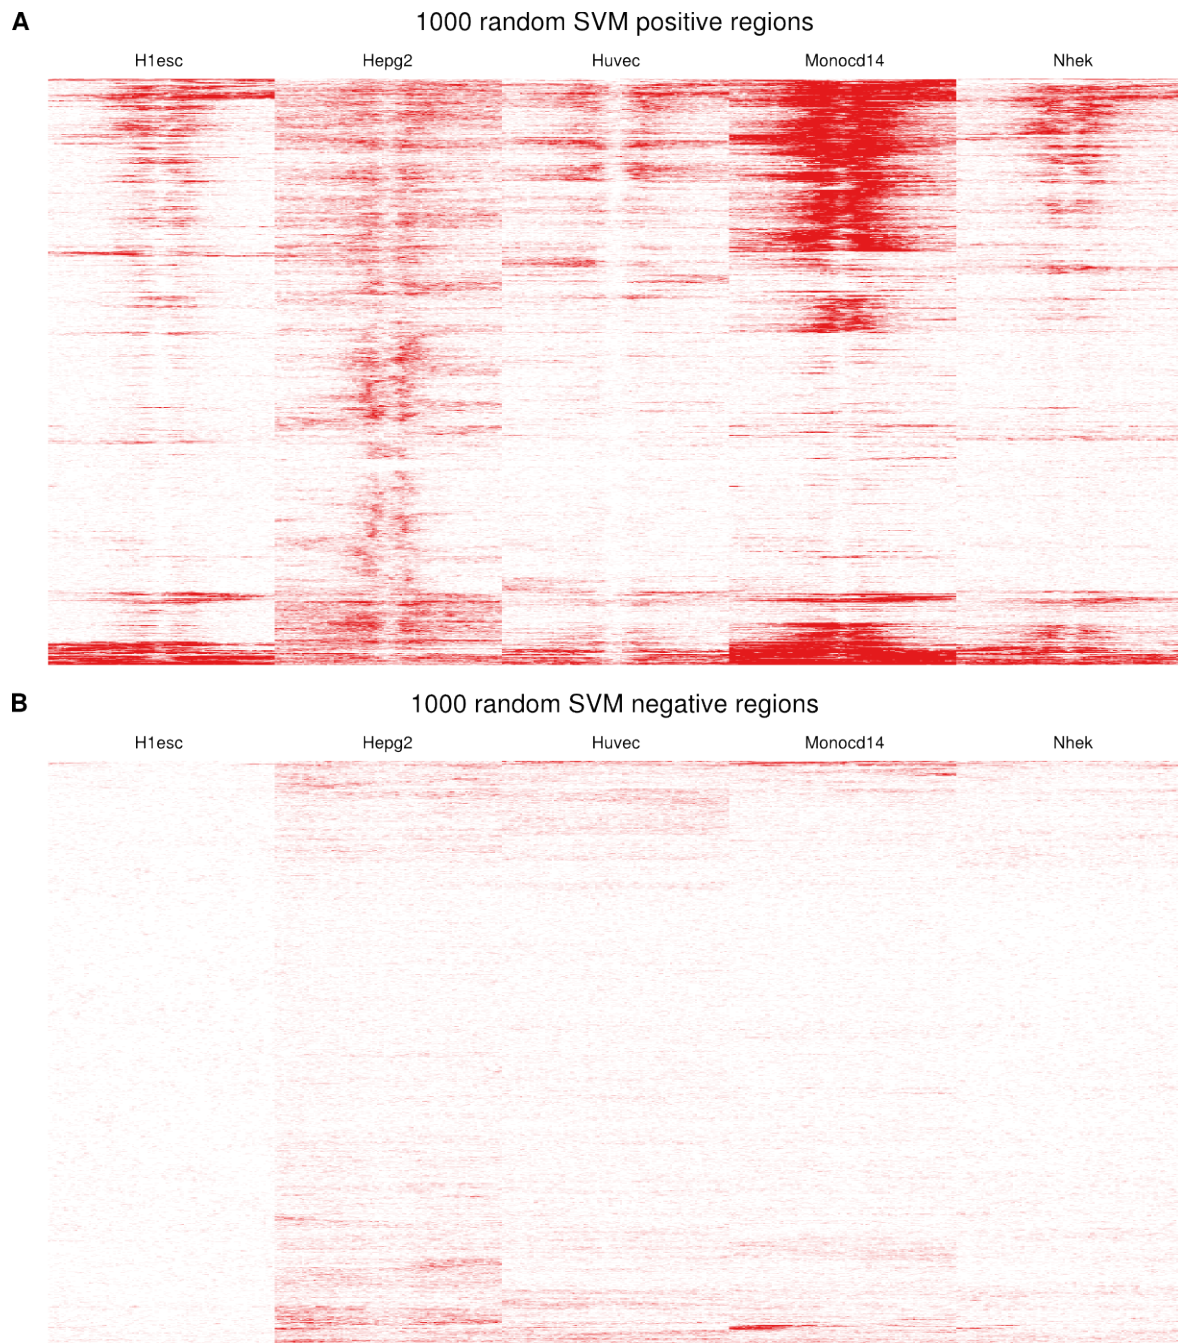

**Supplemental Fig. 13.** Regions with a positive SVM score in H1-hESC ES cells are positive for H3K27me3 in other human cell lines. 1000 regions with a SVM score  $\geq 2$  (**A**) and 1000 regions with a SVM score  $\leq -1$  (**B**) were randomly selected. Shown is the H3K27me3 enrichment in 100 bp bins 5kb around the selected region.

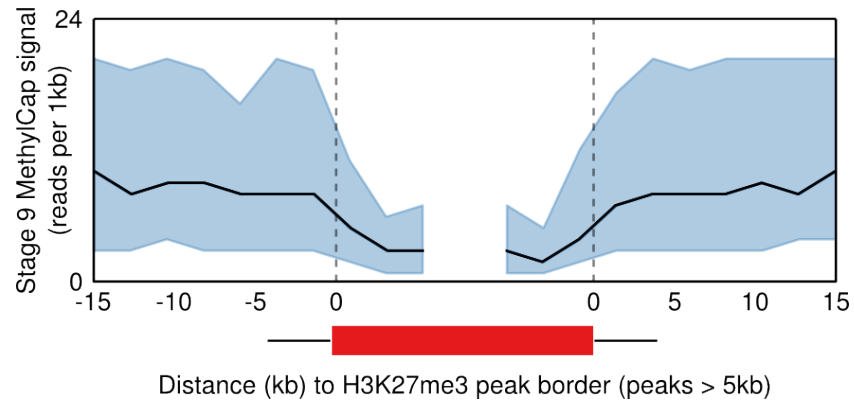

**Supplemental Fig. 14.** Gastrula H3K27me3 peaks are depleted for DNA methylation in blastula-stage embryos. Shown is the median number of blastula MethylCap reads per 1kb (black line) around gastrula H3K27me3 domains larger than 5kb. The blue area contains 50% of the data.



**Supplemental Tables 1-6:****Supplemental Table 1. Datasets and statistics**

| <b>Type</b>       | <b>Stage</b> | <b>GEO accession</b> | <b># mapped reads<br/>(million)</b> | <b># of non-redundant,<br/>uniquely mapped reads<br/>(million)</b> |
|-------------------|--------------|----------------------|-------------------------------------|--------------------------------------------------------------------|
| H3K4me3 ChIP-seq  | 9            | GSM1009589           | 13.80                               | 8.57                                                               |
| H3K4me3 ChIP-seq  | 12           | GSM1009590           | 18.04                               | 10.89                                                              |
| H3K4me3 ChIP-seq  | 16           | GSM1009591           | 14.01                               | 9.64                                                               |
| H3K4me3 ChIP-seq  | 30           | GSM1009592           | 15.14                               | 9.94                                                               |
| H3K27me3 ChIP-seq | 9            | GSM1009593           | 11.56                               | 5.71                                                               |
| H3K27me3 ChIP-seq | 12           | GSM1009594           | 19.04                               | 10.85                                                              |
| H3K27me3 ChIP-seq | 16           | GSM1009595           | 14.05                               | 8.85                                                               |
| H3K27me3 ChIP-seq | 30           | GSM1009596           | 15.95                               | 11.09                                                              |
| RNAPII ChIP-seq   | 9            | GSM1009597           | 25.45                               | 13.90                                                              |
| RNAPII ChIP-seq   | 12           | GSM1009598           | 27.56                               | 19.30                                                              |
| RNAPII ChIP-seq   | 16           | GSM1009599           | 26.16                               | 19.24                                                              |
| RNAPII ChIP-seq   | 30           | GSM1009600           | 23.08                               | 16.96                                                              |
| EZH2 ChIP-seq     | 9            | GSM1009601           | 27.17                               | 12.54                                                              |
| Jarid2 ChIP-seq   | 9            | GSM1009602           | 27.27                               | 15.57                                                              |
| H3K4me1 ChIP-seq  | 9            | GSM1009603           | 30.80                               | 19.98                                                              |
| Input             | 30           | GSM1009604           | 72.45                               | 22.73                                                              |

**Supplemental Table 2 (Heeringen\_Supplemental\_Table2.xls)** Annotation of genes marked by H3K27me3 in *Xenopus tropicalis*. All genes that overlapped with H3K27me3 were submitted to Functional Annotation Clustering at DAVID (<http://david.abcc.ncifcrf.gov/>; Huang et al., 2009).

### Supplemental Table 3 Repeat-analysis of H3K27me3 domains

Shown is the repeat name (according to UCSC Genome Browser annotation), repeat class, repeat type, the number of occurrences in H3K27me3 sites and the overrepresentation as calculated relative to random genomic sequences.

#### Supplemental Table 3-I. Repeat-analysis of H3K27me3 sites, cluster 1

| Repeat          | Class          | Type           | # Occurrences | Over-representation |
|-----------------|----------------|----------------|---------------|---------------------|
| XLGST3          | SINE           | tRNA-V-Core-L2 | 45            | 9.0                 |
| (TA)n           | Simple_repeat  | Simple_repeat  | 91            | 5.3                 |
| AT_rich         | Low_complexity | Low_complexity | 288           | 4.9                 |
| Harbinger-N1_XT | DNA            | PIF-Harbinger  | 37            | 4.4                 |
| POR-1_Xt        | DNA            | hAT-Charlie    | 28            | 4.2                 |
| POR             | DNA            | hAT-Charlie    | 113           | 4.1                 |
| XBR_Xt          | DNA            | Kolobok-T2     | 94            | 4.0                 |
| MuDR1_Xt        | DNA            | MULE-MuDR      | 36            | 3.9                 |
| XBR_XL          | DNA            | Kolobok-T2     | 67            | 3.5                 |
| TE_ORF_340      | Unknown        | Unknown        | 45            | 3.3                 |
| PIR_XL          | DNA            | Kolobok-T2     | 33            | 3.2                 |
| DNA1_Xt         | DNA            | DNA            | 41            | 3.0                 |
| XLLINE          | LINE           | CR1            | 33            | 2.7                 |
| CR1_1b_Xt       | LINE           | CR1            | 44            | 2.3                 |

#### Supplemental Table 3-II. Repeat-analysis of H3K27me3 sites, cluster 2

| Repeat     | Class          | Type           | # Occurrences | Over-representation |
|------------|----------------|----------------|---------------|---------------------|
| (TCTA)n    | Simple_repeat  | Simple_repeat  | 194           | 58.1                |
| (TAGA)n    | Simple_repeat  | Simple_repeat  | 155           | 57.0                |
| (CA)n      | Simple_repeat  | Simple_repeat  | 92            | 56.4                |
| (TG)n      | Simple_repeat  | Simple_repeat  | 111           | 49.3                |
| (TAA)n     | Simple_repeat  | Simple_repeat  | 38            | 20.4                |
| XLGST3     | SINE           | tRNA-V-Core-L2 | 109           | 15.8                |
| (TA)n      | Simple_repeat  | Simple_repeat  | 345           | 14.6                |
| AT_rich    | Low_complexity | Low_complexity | 587           | 7.3                 |
| DNA4Sat_X  | Satellite      | Satellite      | 120           | 6.5                 |
| JH12_XL    | DNA            | TcMar-Tigger   | 597           | 5.4                 |
| POR-1_Xt   | DNA            | hAT-Charlie    | 41            | 4.5                 |
| TE_ORF_340 | Unknown        | Unknown        | 78            | 4.2                 |
| DNA1_Xt    | DNA            | DNA            | 78            | 4.1                 |
| POR        | DNA            | hAT-Charlie    | 149           | 3.9                 |
| DNA2_Xt    | DNA            | PIF-Harbinger  | 186           | 3.8                 |
| REM1_XL    | Satellite      | Satellite      | 38            | 2.9                 |
| XBR_Xt     | DNA            | Kolobok-T2     | 88            | 2.8                 |
| DNA4_Xt    | DNA            | TcMar-Tigger   | 231           | 2.6                 |
| XBR_XL     | DNA            | Kolobok-T2     | 65            | 2.5                 |

**Supplemental Table 3-III. Repeat-analysis of H3K27me3 sites, cluster 3**

| <b>Repeat</b>   | <b>Class</b>   | <b>Type</b>    | <b># Occurrences</b> | <b>Over-representation</b> |
|-----------------|----------------|----------------|----------------------|----------------------------|
| Chap4sat_Xt     | Satellite      | Satellite      | 187                  | 24.5                       |
| Chap4a_Xt       | DNA            | hAT-Charlie    | 595                  | 19.6                       |
| Chap4b_Xt       | DNA            | hAT-Charlie    | 489                  | 17.3                       |
| (CCCTG)n        | Simple_repeat  | Simple_repeat  | 154                  | 16.7                       |
| (CAGGG)n        | Simple_repeat  | Simple_repeat  | 162                  | 16.6                       |
| TE_ORF_98       | Unknown        | Unknown        | 155                  | 10.5                       |
| XLGST3          | SINE           | tRNA-V-Core-L2 | 191                  | 8.1                        |
| PIR_XL          | DNA            | Kolobok-T2     | 380                  | 7.8                        |
| TX1             | LINE           | L1             | 601                  | 7.5                        |
| AT_rich         | Low_complexity | Low_complexity | 1890                 | 6.9                        |
| DNA5_Xt         | DNA            | TcMar-Tc2      | 142                  | 6.8                        |
| OCR             | DNA            | hAT-Ac         | 241                  | 6.6                        |
| XLLINE          | LINE           | CR1            | 368                  | 6.5                        |
| T2_1_Xt         | DNA            | Kolobok-T2     | 166                  | 6.3                        |
| PIRe_Xt         | DNA            | Kolobok-T2     | 140                  | 5.7                        |
| TE_ORF_340      | Unknown        | Unknown        | 361                  | 5.7                        |
| CR1_1b_Xt       | LINE           | CR1            | 490                  | 5.5                        |
| DNA2_Xt         | DNA            | PIF-Harbinger  | 907                  | 5.4                        |
| Sat3_Xt         | Satellite      | Satellite      | 218                  | 5.3                        |
| (TA)n           | Simple_repeat  | Simple_repeat  | 415                  | 5.2                        |
| CR1_1a_Xt       | LINE           | CR1            | 496                  | 5.1                        |
| REM1_XL         | Satellite      | Satellite      | 222                  | 5.0                        |
| POR             | DNA            | hAT-Charlie    | 590                  | 4.6                        |
| XBR_Xt          | DNA            | Kolobok-T2     | 459                  | 4.2                        |
| DNA1_Xt         | DNA            | DNA            | 265                  | 4.1                        |
| Harbinger-N1_XT | DNA            | PIF-Harbinger  | 163                  | 4.1                        |
| JH12_XL         | DNA            | TcMar-Tigger   | 1548                 | 4.1                        |
| DNA4_Xt         | DNA            | TcMar-Tigger   | 1190                 | 4.0                        |
| MuDR1_Xt        | DNA            | MULE-MuDR      | 171                  | 4.0                        |
| XBR_XL          | DNA            | Kolobok-T2     | 342                  | 3.9                        |
| XR_XL           | DNA            | Kolobok-T2     | 159                  | 3.7                        |

**Supplemental Table 4. No enrichment of ncRNAs at sites of early H3K27me3 nucleation**

| <b>Dataset</b>       | <b># of sites with ncRNA<sup>1</sup></b> | <b>p-value<sup>2</sup></b> | <b>q-value<sup>3</sup></b> |
|----------------------|------------------------------------------|----------------------------|----------------------------|
| Gastrula dorsal      | 27                                       | 0.143                      | 0.334                      |
| Gastrula ventral     | 48                                       | 0.039                      | 0.273                      |
| Adult liver          | 3                                        | 0.575                      | 0.575                      |
| Adult skin           | 7                                        | 0.276                      | 0.413                      |
| Oocytes stage I,II   | 20                                       | 0.082                      | 0.289                      |
| Oocytes stage II, IV | 19                                       | 0.295                      | 0.413                      |
| Oocytes stage V,VI   | 14                                       | 0.359                      | 0.419                      |

<sup>1</sup> Out of 221 regions

<sup>2</sup> One-tailed Fisher's exact test

<sup>3</sup> Benjamini-Hochberg

**Supplemental Table 5. Early nucleation sites tested for repressive activity in luciferase vector**

| <b>Genomic position<sup>1</sup></b>      | <b>Gene</b> |
|------------------------------------------|-------------|
| scaffold_51:1047989-1049046              | tbr1        |
| scaffold_163:572638-573798               | hoxd3       |
| scaffold_55:1284126-1285099              | foxl2       |
| scaffold_163:572987-574012               | hoxd3       |
| scaffold_63:1612878-1613871              | tfap2b      |
| scaffold_68:3214875-3215834              | six1        |
| scaffold_163:580186-581153               | hoxd4       |
| scaffold_4:5302999-5304022               | foxd3       |
| scaffold_11:4266992-4267980              | gata3       |
| scaffold_56:1,322,481-1,323,458          | evxl        |
| scaffold_4:1,316,132-1,317,077 (Control) | n/a         |

<sup>1</sup> Genomic position is based on JGI 4.1 (UCSC xenTro2).

**Supplemental Table 6. Overview of all public datasets used in this study.**

| Species              | Data type            | Cell type / developmental stage | Reference                       | Source                   | Remarks                     |
|----------------------|----------------------|---------------------------------|---------------------------------|--------------------------|-----------------------------|
| <i>X. tropicalis</i> | short RNA            | Gastrula dorsal                 | Faunes et al., 2011             | GSM744253 <sup>(1)</sup> |                             |
| <i>X. tropicalis</i> | short RNA            | Gastrula ventral                | Faunes et al., 2011             | GSM744254 <sup>(1)</sup> |                             |
| <i>X. tropicalis</i> | short RNA            | Adult liver                     | Armisen et al., 2009            | GSM372598 <sup>(1)</sup> |                             |
| <i>X. tropicalis</i> | short RNA            | Adult skin                      | Armisen et al., 2009            | GSM372601 <sup>(1)</sup> |                             |
| <i>X. tropicalis</i> | short RNA            | Oocytes stage I,II              | Armisen et al., 2009            | GSM372602 <sup>(1)</sup> |                             |
| <i>X. tropicalis</i> | short RNA            | Oocytes stage II, IV            | Armisen et al., 2009            | GSM372603 <sup>(1)</sup> |                             |
| <i>X. tropicalis</i> | short RNA            | Oocytes stage V,VI              | Armisen et al., 2009            | GSM372604 <sup>(1)</sup> |                             |
| zebrafish            | H3K27me3 ChIP-seq    | shield                          | Pauli et al., 2012              | GSM831521 <sup>(1)</sup> | mapped to danRer7 using bwa |
| zebrafish            | H3K27me3 ChIP-seq    | 24h                             | Irimia et al., unpublished      | GSM861348 <sup>(1)</sup> | mapped to danRer7 using bwa |
| human                | H3K27me3 ChIP-seq    | H1-hESC                         | ENCODE Project Consortium, 2011 | (2)                      | Broad histone modifications |
| human                | H3K27me3 ChIP-seq    | HepG2                           | ENCODE Project Consortium, 2011 | (2)                      | Broad histone modifications |
| human                | H3K27me3 ChIP-seq    | HUVEC                           | ENCODE Project Consortium, 2011 | (2)                      | Broad histone modifications |
| human                | H3K27me3 ChIP-seq    | MONOCD14                        | ENCODE Project Consortium, 2011 | (2)                      | Broad histone modifications |
| human                | H3K27me3 ChIP-seq    | NHEK                            | ENCODE Project Consortium, 2011 | (2)                      | Broad histone modifications |
| <i>X. tropicalis</i> | MethylCap            | stage 9 and 12                  | Bogdanovic et al., 2011         | GSE23913 <sup>(1)</sup>  | mapped to JGI 7.1 using bwa |
| zebrafish            | Bio-CAP              | liver, testes                   | Long et al., 2013               | GSE43512 <sup>(1)</sup>  | mapped to danRer7 using bwa |
| human                | Bio-CAP              | liver, testes                   | Long et al., 2013               | GSE43512 <sup>(1)</sup>  | mapped to hg19 using bwa    |
| <i>X. tropicalis</i> | Bio-CAP              | stage 11-12                     | Long et al., 2013               | GSE43512 <sup>(1)</sup>  | mapped to JGI 7.1 using bwa |
| zebrafish            | Bisulfite sequencing | sphere                          | Potok et al., 2013              | (3)                      |                             |
| human                | Bisulfite sequencing | H1-hESC                         | Lister et al., 2009             | GSM432685 <sup>(1)</sup> |                             |

(1) <http://www.ncbi.nlm.nih.gov/geo/>

(2) <http://genome.ucsc.edu/ENCODE/downloads.html>

(3) HCI's GNomEx: <https://bioserver.hci.utah.edu/gnomex/gnomexFlex.jsp?topicNumber=10>

## References

- Armisen, J., Gilchrist, M.J., Wilczynska, A., Standart, N., and Miska, E.A. (2009). Abundant and dynamically expressed miRNAs, piRNAs, and other small RNAs in the vertebrate *Xenopus tropicalis*. *Genome Res.* 19, 1766–1775.
- Bogdanovic, O., Long, S.W., van Heeringen, S.J., Brinkman, A.B., Gómez-Skarmeta, J.L., Stunnenberg, H.G., Jones, P.L., and Veenstra, G.J.C. (2011). Temporal uncoupling of the DNA methylome and transcriptional repression during embryogenesis. *Genome Res.* 21, 1313–1327.
- ENCODE Project Consortium (2011). A user's guide to the encyclopedia of DNA elements (ENCODE). *PLoS Biol.* 9, e1001046.
- Faunes, F., Sanchez, N., Moreno, M., Olivares, G.H., Lee-Liu, D., Almonacid, L., Slater, A.W., Norambuena, T., Taft, R.J., Mattick, J.S., et al. (2011). Expression of transposable elements in neural tissues during *Xenopus* development. *PloS One* 6, e22569.
- Heeringen, S.J. van, Akhtar, W., Jacobi, U.G., Akkers, R.C., Suzuki, Y., and Veenstra, G.J.C. (2011). Nucleotide composition-linked divergence of vertebrate core promoter architecture. *Genome Res.* 21, 410–421.
- Van Heeringen, S.J., and Veenstra, G.J.C. (2011). GimmeMotifs: a de novo motif prediction pipeline for ChIP-sequencing experiments. *Bioinforma. Oxf. Engl.* 27, 270–271.
- Van der Heijden, T., van Vugt, J.J.F.A., Logie, C., and van Noort, J. (2012). Sequence-based prediction of single nucleosome positioning and genome-wide nucleosome occupancy. *Proc. Natl. Acad. Sci. U. S. A.* 109, E2514–2522.
- Huang, D.W., Sherman, B.T., and Lempicki, R.A. (2009). Systematic and integrative analysis of large gene lists using DAVID bioinformatics resources. *Nat. Protoc.* 4, 44–57.
- Lister, R., Pelizzola, M., Dowen, R.H., Hawkins, R.D., Hon, G., Tonti-Filippini, J., Nery, J.R., Lee, L., Ye, Z., Ngo, Q.-M., et al. (2009). Human DNA methylomes at base resolution show widespread epigenomic differences. *Nature* 462, 315–322.
- Long, H.K., Sims, D., Heger, A., Blackledge, N.P., Kutter, C., Wright, M.L., Grützner, F., Odom, D.T., Patient, R., Ponting, C.P., et al. (2013). Epigenetic conservation at gene regulatory elements revealed by non-methylated DNA profiling in seven vertebrates. *Elife* 2, e00348.
- Newburger, D.E., and Bulyk, M.L. (2009). UniPROBE: an online database of protein binding microarray data on protein-DNA interactions. *Nucleic Acids Res.* 37, D77–82.
- Pauli, A., Valen, E., Lin, M.F., Garber, M., Vastenhouw, N.L., Levin, J.Z., Fan, L., Sandelin, A., Rinn, J.L., Regev, A., et al. (2012). Systematic identification of long noncoding RNAs expressed during zebrafish embryogenesis. *Genome Res.* 22, 577–591.
- Portales-Casamar, E., Thongjuea, S., Kwon, A.T., Arenillas, D., Zhao, X., Valen, E., Yusuf, D., Lenhard, B., Wasserman, W.W., and Sandelin, A. (2009). JASPAR 2010: the greatly expanded



open-access database of transcription factor binding profiles. *Nucleic Acids Res.* 38, D105–D110.

Potok, M.E., Nix, D.A., Parnell, T.J., and Cairns, B.R. (2013). Reprogramming the maternal zebrafish genome after fertilization to match the paternal methylation pattern. *Cell* 153, 759–772.

Takai, D., and Jones, P.A. (2002). Comprehensive analysis of CpG islands in human chromosomes 21 and 22. *Proc. Natl. Acad. Sci. U. S. A.* 99, 3740–3745.
